# Supplementary material for: Physical inactivity as a risk factor to mortality by ischemic heart disease during economic and political crisis in Brazil
Source: PeerJ. 2020 Oct 15;8:e10192. doi: 10.7717/peerj.10192 (PMC7568855; doi:10.7717/peerj.10192)
Supplement: Supplemental Information 5 — The number and standardized mortality rate and information from all states and geographic regions of the country. [file peerj-08-10192-s005.xls]

## Sheet: Plan4
	2007_Deaths_Number_male	2007_lower_95%U.I._Deaths_male	2007_higher_95%U.I._Deaths_male	2017_Deaths_Number_male	2017_lower_95%U.I._Deaths_male	2017_higher_95%U.I._Deaths_male	2007_Rate_deaths_male	2007_lower_95%U.I._rate_Deaths_male	2007_higher_95%U.I._rate_Deaths_male	2017_Rate_deaths_male	2017_lower_95%U.I._rate_Deaths_male	2017_higher_95%U.I._rate_Deaths_male	percent_Change_deaths_male	change_lower_95%U.I._male	change_higher_95%U.I._male	2007_Deaths_Number_female	2007_lower_95%U.I._Deaths_female	2007_higher_95%U.I._Deaths_female	2017_Deaths_Number_female	2017_lower_95%U.I._Deaths_female	2017_higher_95%U.I._Deaths_female	2007_Rate_deaths_female	2007_lower_95%U.I._rate_Deaths_female	2007_higher_95%U.I._rate_Deaths_female	2017_Rate_deaths_female	2017_lower_95%U.I._rate_Deaths_female	2017_higher_95%U.I._rate_Deaths_female	percent_Change_deaths_female	change_lower_95%U.I._female	change_higher_95%U.I._female	SDI_2007	SDI_2017
Brazil	9.585	4.495	15.743	11.821	5.541	19.548	14.2	6.6	23.3	12.4	5.8	20.5	-12.0	-16.0	-10.0	9.585	4.495	15.743	11.821	5.541	19.548	14.2	6.6	23.3	12.4	5.8	20.5	-12.0	-16.0	-10.0	0.590947	0.655196
Northen	433	203	710	652	304	1.073	11.7	5.4	19.2	10.8	5.0	17.9	-6.7	-16.1	3.1	433	203	710	652	304	1.073	11.7	5.4	19.2	10.8	5.0	17.9	-6.7	-16.1	3.1	0.543978	0.621006
Acre	20	9	32	26	12	44	10.9	5.0	17.8	9.9	4.5	16.6	-9.0	-17.0	-1.0	20	9	32	26	12	44	10.9	5.0	17.8	9.9	4.5	16.6	-9.0	-17.0	-1.0	0.517455	0.601605
Amapá	11	5	18	20	10	33	10.2	4.8	16.8	10.5	4.9	17.2	3.0	-5.0	10.0	11	5	18	20	10	33	10.2	4.8	16.8	10.5	4.9	17.2	3.0	-5.0	10.0	0.590775	0.658518
Amazonas	70	33	115	104	48	171	9.3	4.4	15.3	9.0	4.2	14.8	-3.0	-11.0	4.0	70	33	115	104	48	171	9.3	4.4	15.3	9.0	4.2	14.8	-3.0	-11.0	4.0	0.553433	0.629316
Pará	211	99	347	334	157	544	10.9	5.1	17.9	11.4	5.4	18.7	5.0	-2.0	12.0	211	99	347	334	157	544	10.9	5.1	17.9	11.4	5.4	18.7	5.0	-2.0	12.0	0.506365	0.578664
Rondônia	60	28	97	85	39	142	13.9	6.5	22.4	13.1	6.0	21.6	-6.0	-21.0	13.0	60	28	97	85	39	142	13.9	6.5	22.4	13.1	6.0	21.6	-6.0	-21.0	13.0	0.551074	0.621702
Roraima	10	5	17	16	7	27	15.2	6.9	25.2	11.8	5.5	19.9	-22.0	-34.0	-10.0	10	5	17	16	7	27	15.2	6.9	25.2	11.8	5.5	19.9	-22.0	-34.0	-10.0	0.561694	0.646355
Tocantins	51	24	84	67	31	112	11.6	5.4	19.0	9.9	4.5	16.5	-15.0	-23.0	-6.0	51	24	84	67	31	112	11.6	5.4	19.0	9.9	4.5	16.5	-15.0	-23.0	-6.0	0.527048	0.610879
Northeastern	2.399	1.118	3.915	3.123	1.457	5.146	12.4	5.8	20.3	12.3	5.8	20.3	-1.0	-9.1	7.6	2.399	1.118	3.915	3.123	1.457	5.146	12.4	5.8	20.3	12.3	5.8	20.3	-1.0	-9.1	7.6	0.502141	0.577093
Alagoas	123	59	204	161	75	267	12.5	6.0	20.7	12.2	5.7	20.3	-2.0	-9.0	5.0	123	59	204	161	75	267	12.5	6.0	20.7	12.2	5.7	20.3	-2.0	-9.0	5.0	0.478343	0.555715
Bahia	607	280	987	786	369	1.28	11.6	5.4	18.9	11.5	5.4	18.6	-1.0	-10.0	8.0	607	280	987	786	369	1.28	11.6	5.4	18.9	11.5	5.4	18.6	-1.0	-10.0	8.0	0.517916	0.59102
Ceará	352	163	577	431	195	720	11.1	5.2	18.2	10.0	4.6	16.7	-9.0	-16.0	-1.0	352	163	577	431	195	720	11.1	5.2	18.2	10.0	4.6	16.7	-9.0	-16.0	-1.0	0.527744	0.599502
Maranhão	252	118	418	359	170	596	12.2	5.7	20.2	12.8	6.1	21.3	5.0	-3.0	15.0	252	118	418	359	170	596	12.2	5.7	20.2	12.8	6.1	21.3	5.0	-3.0	15.0	0.417599	0.50704
Paraíba	232	108	374	269	124	443	14.3	6.7	23.1	13.5	6.2	22.3	-6.0	-16.0	5.0	232	108	374	269	124	443	14.3	6.7	23.1	13.5	6.2	22.3	-6.0	-16.0	5.0	0.501111	0.574463
Pernambuco	475	223	775	632	297	1.039	15.3	7.1	24.9	15.6	7.4	25.7	2.0	-6.0	10.0	475	223	775	632	297	1.039	15.3	7.1	24.9	15.6	7.4	25.7	2.0	-6.0	10.0	0.524703	0.593553
Piauí	148	69	239	183	85	299	12.7	5.9	20.5	11.4	5.3	18.6	-10.0	-16.0	-4.0	148	69	239	183	85	299	12.7	5.9	20.5	11.4	5.3	18.6	-10.0	-16.0	-4.0	0.473289	0.55162
Rio Grande do Norte	142	66	230	206	97	344	11.6	5.4	18.8	12.7	6.0	21.2	10.0	1.0	20.0	142	66	230	206	97	344	11.6	5.4	18.8	12.7	6.0	21.2	10.0	1.0	20.0	0.532304	0.605294
Sergipe	68	32	111	96	45	158	10.7	5.0	17.5	10.9	5.1	17.9	2.0	-7.0	10.0	68	32	111	96	45	158	10.7	5.0	17.5	10.9	5.1	17.9	2.0	-7.0	10.0	0.546264	0.615628
Mid-Western	560	264	919	732	347	1.21	14.4	6.7	23.6	11.9	5.6	19.5	-17.8	-23.8	-11.8	560	264	919	732	347	1.21	14.4	6.7	23.6	11.9	5.6	19.5	-17.8	-23.8	-11.8	0.626668	0.688676
Distrito Federal	73	34	118	95	45	156	16.2	7.4	26.2	12.0	5.5	19.6	-26.0	-32.0	-20.0	73	34	118	95	45	156	16.2	7.4	26.2	12.0	5.5	19.6	-26.0	-32.0	-20.0	0.737666	0.79189
Goiás	241	115	397	315	150	522	12.3	5.8	20.2	10.7	5.1	17.7	-13.0	-19.0	-7.0	241	115	397	315	150	522	12.3	5.8	20.2	10.7	5.1	17.7	-13.0	-19.0	-7.0	0.586488	0.650146
Mato Grosso	114	53	187	150	71	248	12.8	5.9	20.9	10.7	5.0	17.5	-17.0	-23.0	-11.0	114	53	187	150	71	248	12.8	5.9	20.9	10.7	5.0	17.5	-17.0	-23.0	-11.0	0.596019	0.662455
Mato Grosso do Sul	132	62	217	172	81	284	16.4	7.7	27.0	14.0	6.6	23.0	-15.0	-21.0	-9.0	132	62	217	172	81	284	16.4	7.7	27.0	14.0	6.6	23.0	-15.0	-21.0	-9.0	0.586501	0.650211
Southeast	4.686	2.194	7.682	5.55	2.61	9.107	15.7	7.4	25.7	12.7	6.0	20.8	-19.0	-24.5	-14.3	4.686	2.194	7.682	5.55	2.61	9.107	15.7	7.4	25.7	12.7	6.0	20.8	-19.0	-24.5	-14.3	0.637869	0.691587
Espírito Santo	180	85	292	195	93	316	14.8	6.9	24.1	10.9	5.2	17.7	-26.0	-31.0	-22.0	180	85	292	195	93	316	14.8	6.9	24.1	10.9	5.2	17.7	-26.0	-31.0	-22.0	0.618468	0.676647
Minas Gerais	919	430	1.506	1.082	505	1.782	11.7	5.5	19.2	9.7	4.6	16.0	-17.0	-24.0	-12.0	919	430	1.506	1.082	505	1.782	11.7	5.5	19.2	9.7	4.6	16.0	-17.0	-24.0	-12.0	0.60448	0.660795
Rio de Janeiro	1.237	586	2.007	1.462	693	2.379	20.0	9.4	32.5	16.9	8.0	27.5	-15.0	-20.0	-10.0	1.237	586	2.007	1.462	693	2.379	20.0	9.4	32.5	16.9	8.0	27.5	-15.0	-20.0	-10.0	0.659914	0.708856
São Paulo	2.35	1.093	3.877	2.811	1.319	4.63	16.3	7.6	26.9	13.4	6.2	22.0	-18.0	-23.0	-13.0	2.35	1.093	3.877	2.811	1.319	4.63	16.3	7.6	26.9	13.4	6.2	22.0	-18.0	-23.0	-13.0	0.668614	0.720052
Southern	1.51	714	2.479	1.764	834	2.911	14.8	6.9	24.3	12.0	5.7	19.9	-18.7	-23.7	-14.0	1.51	714	2.479	1.764	834	2.911	14.8	6.9	24.3	12.0	5.7	19.9	-18.7	-23.7	-14.0	0.644079	0.697619
Paraná	566	270	928	662	314	1.084	14.9	7.0	24.4	12.4	5.9	20.3	-17.0	-22.0	-12.0	566	270	928	662	314	1.084	14.9	7.0	24.4	12.4	5.9	20.3	-17.0	-22.0	-12.0	0.628058	0.682437
Rio Grande do Sul	650	306	1.065	740	349	1.227	14.9	7.0	24.5	12.1	5.7	20.1	-19.0	-24.0	-14.0	650	306	1.065	740	349	1.227	14.9	7.0	24.5	12.1	5.7	20.1	-19.0	-24.0	-14.0	0.641226	0.692743
Santa Catarina	294	138	486	362	171	600	14.6	6.8	24.0	11.6	5.5	19.4	-20.0	-25.0	-16.0	294	138	486	362	171	600	14.6	6.8	24.0	11.6	5.5	19.4	-20.0	-25.0	-16.0	0.646931	0.702496
