# Supplementary material for: Physical inactivity as a risk factor to mortality by ischemic heart disease during economic and political crisis in Brazil
Source: PeerJ journal article supplement (doi:10.7717/peerj.10192), 2020-10-15
Supplement: Supplemental_Table_S1.pdf [file Supplemental_Table_S1.pdf]

**Supplemental Table S1.** Incidence of ischemic heart disease in Brazilian male population in the years 2007 and 2017.

|                     | 2007   |          |        | 2017    |          |         | 2007  |          |       | 2017  |          |       | Change  |          |       |
|---------------------|--------|----------|--------|---------|----------|---------|-------|----------|-------|-------|----------|-------|---------|----------|-------|
|                     | Number | 95% U.I. |        | Number  | 95% U.I. |         | Rate* | 95% U.I. |       | Rate* | 95% U.I. |       | % rate* | 95% U.I. |       |
| <b>Brazil</b>       | 87,893 | 78,323   | 98,486 | 104,655 | 91,455   | 119,062 | 123.3 | 110.6    | 137.3 | 104.2 | 91.2     | 118.6 | -15.0   | -18.0    | -13.0 |
| <b>Northen</b>      | 4,274  | 3,689    | 4,887  | 6,144   | 5,281    | 7,077   | 96.4  | 83.3     | 111.1 | 91.4  | 78.2     | 106.0 | -5.4    | -10.4    | 0.0   |
| Acre                | 194    | 167      | 222    | 269     | 230      | 311     | 99.7  | 85.6     | 115.0 | 93.0  | 79.4     | 108.9 | -7.0    | -12.0    | -1.0  |
| Amapá               | 125    | 107      | 145    | 210     | 179      | 243     | 91.9  | 79.1     | 106.0 | 89.5  | 76.7     | 104.0 | -3.0    | -8.0     | 2.0   |
| Amazonas            | 791    | 681      | 906    | 1,159   | 985      | 1,338   | 92.1  | 79.6     | 106.3 | 87.9  | 74.6     | 102.0 | -5.0    | -10.0    | 1.0   |
| Pará                | 2,115  | 1,832    | 2,408  | 3,013   | 2,606    | 3,462   | 100.0 | 87.1     | 114.7 | 94.8  | 81.8     | 109.9 | -5.0    | -10.0    | 0.0   |
| Rondônia            | 486    | 418      | 559    | 678     | 581      | 784     | 99.2  | 85.9     | 114.0 | 92.5  | 79.2     | 106.8 | -7.0    | -12.0    | -2.0  |
| Roraima             | 93     | 79       | 108    | 159     | 136      | 184     | 93.3  | 80.2     | 108.1 | 88.1  | 75.6     | 102.0 | -6.0    | -11.0    | 0.0   |
| Tocantins           | 470    | 405      | 539    | 656     | 564      | 755     | 98.9  | 85.3     | 113.4 | 93.7  | 80.4     | 108.6 | -5.0    | -10.0    | 0.0   |
| <b>Northeastern</b> | 22,654 | 18,905   | 25,677 | 26,683  | 24,309   | 32,191  | 109.4 | 95.5     | 124.6 | 101.2 | 87.4     | 116.3 | -7.6    | -12.4    | -2.2  |
| Alagoas             | 1,084  | 937      | 1,241  | 1,351   | 1,166    | 1,551   | 106.6 | 92.2     | 122.3 | 98.2  | 84.6     | 113.3 | -8.0    | -13.0    | -3.0  |
| Bahia               | 7,207  | 6,372    | 8,159  | 9,143   | 7,931    | 10,424  | 134.7 | 119.3    | 152.9 | 129.6 | 112.3    | 147.7 | -4.0    | -9.0     | 2.0   |
| Ceará               | 3,352  | 2,929    | 3,797  | 4,159   | 3,588    | 4,776   | 104.4 | 91.0     | 118.7 | 95.2  | 82.1     | 109.3 | -9.0    | -14.0    | -4.0  |
| Maranhão            | 2,279  | 1,977    | 2,603  | 2,979   | 2,574    | 3,429   | 106.9 | 93.0     | 121.8 | 101.8 | 87.9     | 116.8 | -5.0    | -10.0    | 1.0   |
| Paraíba             | 1,729  | 1,518    | 1,964  | 1,968   | 1,698    | 2,258   | 108.7 | 94.8     | 123.8 | 98.3  | 84.7     | 113.1 | -10.0   | -15.0    | -4.0  |
| Pernambuco          | 3,901  | 3,429    | 4,372  | 4,515   | 3,937    | 5,187   | 123.0 | 108.5    | 137.9 | 107.6 | 93.8     | 123.5 | -12.0   | -17.0    | -7.0  |
| Piauí               | 1,219  | 1,070    | 1,392  | 1,540   | 1,329    | 1,795   | 102.2 | 89.7     | 117.0 | 94.1  | 81.3     | 109.7 | -8.0    | -13.0    | -3.0  |
| Rio Grande do Norte | 1,225  | 1,063    | 1,395  | 1,548   | 1,343    | 1,772   | 99.5  | 86.2     | 113.8 | 93.9  | 81.1     | 107.6 | -6.0    | -10.0    | 0.0   |
| Sergipe             | 658    | 573      | 754    | 866     | 743      | 999     | 98.3  | 84.9     | 113.3 | 92.0  | 78.8     | 106.0 | -6.0    | -11.0    | -2.0  |
| <b>Mid-Western</b>  | 4,842  | 2,416    | 5,550  | 5,451   | 5,770    | 4,591   | 102.8 | 89.1     | 117.9 | 93.9  | 80.5     | 108.3 | -8.8    | -13.8    | -3.3  |
| Distrito Federal    | 604    | 515      | 697    | 919     | 783      | 1,064   | 93.3  | 80.3     | 107.3 | 85.6  | 73.4     | 98.5  | -8.0    | -13.0    | -3.0  |
| Goiás               | 2,267  | 1,970    | 2,587  | 3,077   | 2,644    | 353     | 107.8 | 93.6     | 123.3 | 98.4  | 84.6     | 113.1 | -9.0    | -14.0    | -3.0  |
| Mato Grosso         | 998    | 858      | 1,144  | 1,442   | 1,226    | 1,671   | 100.7 | 87.3     | 115.5 | 92.5  | 78.8     | 107.2 | -8.0    | -13.0    | -3.0  |
| Mato Grosso do Sul  | 973    | 846      | 1,122  | 1,300   | 1,117    | 1,503   | 109.4 | 95.2     | 125.4 | 98.9  | 85.2     | 114.2 | -10.0   | -15.0    | -4.0  |
| <b>Southeast</b>    | 42,384 | 38,015   | 27,400 | 45,966  | 41,540   | 54,216  | 127.0 | 113.8    | 141.7 | 103.2 | 90.1     | 117.6 | -18.0   | -23.3    | -12.8 |
| Espírito Santo      | 1,378  | 1,198    | 1,584  | 1,780   | 1,525    | 2,059   | 105.2 | 91.5     | 119.9 | 92.7  | 79.8     | 106.6 | -12.0   | -17.0    | -6.0  |
| Minas Gerais        | 9,355  | 8,344    | 105    | 11,325  | 9,882    | 12,958  | 115.1 | 103.2    | 129.1 | 98.6  | 86.2     | 112.6 | -14.0   | -20.0    | -9.0  |
| Rio de Janeiro      | 9,415  | 8,429    | 1,047  | 10,177  | 8,875    | 11,582  | 144.9 | 131.2    | 159.9 | 112.9 | 98.8     | 128.3 | -22.0   | -27.0    | -17.0 |
| São Paulo           | 22,236 | 20,044   | 24,664 | 24,286  | 21,258   | 27,617  | 142.7 | 129.2    | 158.0 | 108.4 | 95.4     | 122.7 | -24.0   | -29.0    | -19.0 |
| <b>Southern</b>     | 13,739 | 12,046   | 15,521 | 13,012  | 10,923   | 18,534  | 122.4 | 107.9    | 137.8 | 102.2 | 88.6     | 116.7 | -16.3   | -21.7    | -11.3 |
| Paraná              | 5,074  | 4,462    | 5,725  | 5,923   | 5,101    | 6,787   | 124.4 | 110.1    | 140.1 | 103.0 | 89.3     | 117.3 | -17.0   | -22.0    | -12.0 |
| Rio Grande do Sul   | 6,062  | 5,317    | 6,814  | 6,742   | 5,819    | 7,765   | 128.7 | 113.6    | 144.1 | 103.9 | 90.2     | 118.8 | -19.0   | -25.0    | -14.0 |
| Santa Catarina      | 2,603  | 2,267    | 2,982  | 3,470   | 3,000    | 3,982   | 114.2 | 100.1    | 129.3 | 99.6  | 86.4     | 113.9 | -13.0   | -18.0    | -8.0  |

\*Age-standardized rate; U.I.: uncertainty interval.
