# Supplementary material for: Physical inactivity as a risk factor to mortality by ischemic heart disease during economic and political crisis in Brazil
Source: PeerJ journal article supplement (doi:10.7717/peerj.10192), 2020-10-15
Supplement: Supplemental_Table_S2.pdf [file Supplemental_Table_S2.pdf]

**Supplemental Table S2.** Incidence of ischemic heart disease in Brazilian female population in the years 2007 and 2017.

|                     | 2007   |          | 2017   |          | 2007   |          | 2017  |          | Change  |          |      |      |       |       |       |
|---------------------|--------|----------|--------|----------|--------|----------|-------|----------|---------|----------|------|------|-------|-------|-------|
|                     | Number | 95% U.I. | Number | 95% U.I. | Rate*  | 95% U.I. | Rate* | 95% U.I. | % rate* | 95% U.I. |      |      |       |       |       |
| <b>Brazil</b>       | 60,989 | 53,930   | 68,671 | 72,314   | 62,973 | 83,031   | 70.5  | 62.3     | 79.4    | 58.1     | 50.6 | 66.7 | -18.0 | -20.0 | -15.0 |
| <b>Northern</b>     | 2,392  | 2,034    | 2,764  | 3,427    | 2,928  | 3,983    | 54.4  | 46.4     | 63.0    | 50.1     | 42.7 | 58.5 | -7.9  | -13.0 | -2.7  |
| Acre                | 104    | 88       | 120    | 152      | 128    | 177      | 56.4  | 48.2     | 65.7    | 51.1     | 43.5 | 59.9 | -9.0  | -15.0 | -4.0  |
| Amapá               | 73     | 62       | 85     | 121      | 103    | 142      | 51.8  | 43.9     | 60.5    | 48.9     | 41.8 | 57.7 | -6.0  | -11.0 | -1.0  |
| Amazonas            | 460    | 393      | 531    | 661      | 561    | 772      | 51.9  | 44.3     | 60.1    | 48.3     | 41.1 | 56.3 | -7.0  | -12.0 | -2.0  |
| Pará                | 1,225  | 1,045    | 1,413  | 1,712    | 1,470  | 1,984    | 55.7  | 47.6     | 64.3    | 51.1     | 43.5 | 59.2 | -8.0  | -13.0 | -3.0  |
| Rondônia            | 238    | 200      | 276    | 354      | 302    | 411      | 55.6  | 47.8     | 64.4    | 50.6     | 43.3 | 58.9 | -9.0  | -14.0 | -4.0  |
| Roraima             | 46     | 38       | 54     | 79       | 66     | 93       | 52.8  | 45.0     | 60.7    | 48.7     | 41.4 | 56.6 | -8.0  | -13.0 | -2.0  |
| Tocantins           | 246    | 208      | 285    | 348      | 298    | 404      | 56.5  | 48.2     | 65.6    | 51.8     | 44.1 | 61.0 | -8.0  | -13.0 | -3.0  |
| <b>Northeastern</b> | 15,630 | 13,587   | 17,866 | 19,356   | 16,714 | 22,412   | 61.8  | 53.4     | 71.1    | 55.7     | 47.8 | 64.6 | -10.1 | -14.7 | -4.8  |
| Alagoas             | 743    | 639      | 851    | 935      | 802    | 1,085    | 60.7  | 52.0     | 69.9    | 54.9     | 46.9 | 63.8 | -10.0 | -14.0 | -4.0  |
| Bahia               | 4,887  | 4,271    | 5,538  | 6,200    | 5,359  | 7,188    | 76.5  | 66.6     | 87.0    | 70.7     | 61.0 | 81.9 | -8.0  | -13.0 | -2.0  |
| Ceará               | 2,381  | 2,061    | 2,739  | 2,953    | 2,564  | 3,405    | 60.3  | 52.0     | 69.3    | 53.8     | 46.5 | 62.4 | -11.0 | -15.0 | -5.0  |
| Maranhão            | 1,344  | 1,159    | 1,543  | 1,777    | 1,520  | 2,058    | 57.2  | 49.2     | 65.8    | 52.8     | 45.0 | 61.4 | -8.0  | -13.0 | -3.0  |
| Paraíba             | 1,262  | 1,098    | 1,453  | 1,446    | 1,250  | 1,669    | 62.7  | 54.4     | 72.5    | 55.3     | 47.6 | 63.9 | -12.0 | -17.0 | -6.0  |
| Pernambuco          | 2,912  | 2,540    | 3,327  | 3,362    | 2,913  | 3,892    | 70.4  | 61.2     | 80.5    | 60.1     | 51.9 | 69.5 | -15.0 | -19.0 | -10.0 |
| Piauí               | 792    | 686      | 911    | 1,011    | 857    | 1,173    | 56.5  | 48.7     | 65.3    | 51.6     | 43.7 | 60.1 | -9.0  | -13.0 | -4.0  |
| Rio Grande do Norte | 847    | 737      | 971    | 1,072    | 933    | 1,247    | 55.9  | 48.4     | 64.4    | 51.1     | 44.2 | 59.7 | -8.0  | -13.0 | -4.0  |
| Sergipe             | 462    | 396      | 533    | 600      | 516    | 695      | 56.2  | 47.9     | 64.8    | 50.7     | 43.5 | 59.1 | -10.0 | -15.0 | -5.0  |
| <b>Mid-Western</b>  | 2,826  | 2,438    | 3,267  | 4,052    | 3,464  | 4,705    | 57.8  | 49.9     | 66.7    | 51.6     | 44.2 | 60.2 | -10.8 | -15.3 | -5.5  |
| Distrito Federal    | 415    | 354      | 483    | 641      | 544    | 749      | 52.5  | 45.3     | 60.7    | 47.0     | 40.1 | 54.8 | -11.0 | -15.0 | -6.0  |
| Goiás               | 1,351  | 1,171    | 1,559  | 1,874    | 1,604  | 2,166    | 62.0  | 53.9     | 71.4    | 54.5     | 46.8 | 63.6 | -12.0 | -16.0 | -7.0  |
| Mato Grosso         | 504    | 433      | 584    | 753      | 647    | 880      | 56.4  | 48.4     | 65.1    | 50.6     | 43.4 | 59.0 | -10.0 | -15.0 | -5.0  |
| Mato Grosso do Sul  | 556    | 480      | 641    | 784      | 669    | 910      | 60.2  | 52.1     | 69.4    | 54.4     | 46.6 | 63.3 | -10.0 | -15.0 | -4.0  |
| <b>Southeast</b>    | 30,293 | 26,892   | 34,099 | 34,172   | 29,666 | 39,307   | 70.9  | 62.8     | 80.1    | 57.1     | 49.3 | 65.9 | -18.8 | -24.0 | -13.8 |
| Espírito Santo      | 889    | 766      | 1,025  | 1,161    | 998    | 1,356    | 58.3  | 50.4     | 67.1    | 50.7     | 43.5 | 59.0 | -13.0 | -18.0 | -8.0  |
| Minas Gerais        | 6,559  | 5,778    | 7,446  | 7,766    | 6,691  | 8,915    | 67.4  | 59.3     | 76.6    | 55.9     | 48.2 | 64.5 | -17.0 | -22.0 | -12.0 |
| Rio de Janeiro      | 7,097  | 6,308    | 7,986  | 7,703    | 6,642  | 8,859    | 77.8  | 69.6     | 87.2    | 61.2     | 52.7 | 70.4 | -21.0 | -27.0 | -16.0 |
| São Paulo           | 15,748 | 14,040   | 17,642 | 17,542   | 15,335 | 20,177   | 80.1  | 71.7     | 89.5    | 60.5     | 52.9 | 69.8 | -24.0 | -29.0 | -19.0 |
| <b>Southern</b>     | 9,847  | 8,636    | 11,214 | 11,309   | 9,785  | 13,097   | 71.7  | 63.1     | 81.5    | 57.7     | 50.0 | 66.8 | -19.7 | -24.7 | -14.3 |
| Paraná              | 3,342  | 2,923    | 3,807  | 3,962    | 3,415  | 4,626    | 73.3  | 64.5     | 83.1    | 58.2     | 50.2 | 67.9 | -21.0 | -26.0 | -15.0 |
| Rio Grande do Sul   | 4,739  | 4,178    | 5,384  | 5,044    | 4,374  | 5,818    | 76.1  | 67.3     | 85.9    | 58.9     | 51.2 | 68.0 | -23.0 | -28.0 | -18.0 |
| Santa Catarina      | 1,766  | 1,535    | 2,023  | 2,303    | 1,996  | 2,653    | 65.8  | 57.4     | 75.6    | 55.9     | 48.6 | 64.5 | -15.0 | -20.0 | -10.0 |

\*Age-standardized rate; U.I.: uncertainty interval.
