# Supplementary material for: Physical inactivity as a risk factor to mortality by ischemic heart disease during economic and political crisis in Brazil
Source: PeerJ journal article supplement (doi:10.7717/peerj.10192), 2020-10-15
Supplement: Supplemental_Table_S3.pdf [file Supplemental_Table_S3.pdf]

**Supplemental Table S3.** Age-standardized summary exposure value to physical inactivity in the Brazilian male population in 1990 and 2017 in ages  $\geq 25$  years.

|                     | 2007 |          |      | 2017 |          |      |
|---------------------|------|----------|------|------|----------|------|
|                     | SEV* | 95% U.I. |      | SEV* | 95% U.I. |      |
| <b>Brazil</b>       | 57.9 | 22.9     | 99.9 | 58.1 | 22.9     | 99.9 |
| <b>Northen</b>      | 56.9 | 22.6     | 99.9 | 57.0 | 22.6     | 99.9 |
| Acre                | 57.4 | 22.8     | 99.9 | 57.6 | 22.8     | 99.9 |
| Amapá               | 58.9 | 23.1     | 99.9 | 58.8 | 23.0     | 99.9 |
| Amazonas            | 56.7 | 22.6     | 99.9 | 56.9 | 22.6     | 99.9 |
| Pará                | 55.4 | 22.4     | 99.9 | 55.9 | 22.4     | 99.9 |
| Rondônia            | 60.0 | 23.1     | 99.9 | 60.1 | 23.1     | 99.9 |
| Roraima             | 55.7 | 22.4     | 99.9 | 55.9 | 22.4     | 99.9 |
| Tocantins           | 53.9 | 21.9     | 99.9 | 54.2 | 22.0     | 99.9 |
| <b>Northeastern</b> | 55.8 | 22.4     | 99.9 | 56.0 | 22.5     | 99.9 |
| Alagoas             | 54.0 | 21.9     | 99.9 | 53.9 | 22.0     | 99.9 |
| Bahia               | 57.0 | 22.7     | 99.9 | 56.9 | 22.8     | 99.9 |
| Ceará               | 57.8 | 22.8     | 99.9 | 57.6 | 22.8     | 99.9 |
| Maranhão            | 51.0 | 21.1     | 99.5 | 51.9 | 21.4     | 99.9 |
| Paraíba             | 57.1 | 22.7     | 99.9 | 57.4 | 22.7     | 99.9 |
| Pernambuco          | 57.1 | 22.8     | 99.9 | 57.5 | 22.8     | 99.9 |
| Piauí               | 55.6 | 22.4     | 99.9 | 55.5 | 22.4     | 99.9 |
| Rio Grande do Norte | 56.9 | 22.7     | 99.9 | 56.8 | 22.8     | 99.9 |
| Sergipe             | 55.8 | 22.5     | 99.9 | 56.2 | 22.5     | 99.9 |
| <b>Mid-Western</b>  | 57.7 | 22.8     | 99.9 | 57.8 | 22.8     | 99.9 |
| Distrito Federal    | 64.7 | 24.2     | 99.9 | 64.8 | 24.1     | 99.9 |
| Goiás               | 55.3 | 22.4     | 99.9 | 55.3 | 22.4     | 99.9 |
| Mato Grosso         | 55.4 | 22.4     | 99.9 | 55.5 | 22.4     | 99.9 |
| Mato Grosso do Sul  | 55.4 | 22.4     | 99.9 | 55.5 | 22.4     | 99.9 |
| <b>Southeast</b>    | 59.5 | 23.2     | 99.9 | 59.7 | 23.2     | 99.9 |
| Espírito Santo      | 57.2 | 22.8     | 99.9 | 57.4 | 22.9     | 99.9 |
| Minas Gerais        | 57.2 | 22.8     | 99.9 | 56.8 | 22.6     | 99.9 |
| Rio de Janeiro      | 63.7 | 24.0     | 99.9 | 63.8 | 24.0     | 99.9 |
| São Paulo           | 59.9 | 23.3     | 99.9 | 60.7 | 23.5     | 99.9 |
| <b>Southern</b>     | 56.7 | 22.7     | 99.9 | 56.7 | 22.7     | 99.9 |
| Paraná              | 56.8 | 22.8     | 99.9 | 56.6 | 22.7     | 99.9 |
| Rio Grande do Sul   | 55.5 | 22.4     | 99.9 | 55.9 | 22.5     | 99.9 |
| Santa Catarina      | 57.7 | 22.9     | 99.9 | 57.8 | 22.8     | 99.9 |

\*Age-standardized rate; U.I.: uncertainty interval; SEV: summary exposure value.
