# Supplementary material for: Physical inactivity as a risk factor to mortality by ischemic heart disease during economic and political crisis in Brazil
Source: PeerJ journal article supplement (doi:10.7717/peerj.10192), 2020-10-15
Supplement: Supplemental_Table_S4.pdf [file Supplemental_Table_S4.pdf]

**Supplemental Table S4.** Age-standardized summary exposure value to physical inactivity in the Brazilian female population in 1990 and 2017 in ages  $\geq 25$  years.

|                     | 2007 |          |      | 2017 |          |      |
|---------------------|------|----------|------|------|----------|------|
|                     | SEV* | 95% U.I. |      | SEV* | 95% U.I. |      |
| <b>Brazil</b>       | 59.1 | 20.9     | 99.9 | 59.2 | 20.9     | 99.9 |
| <b>Northen</b>      | 59.0 | 20.9     | 99.9 | 59.2 | 20.9     | 99.9 |
| Acre                | 58.6 | 20.8     | 99.9 | 58.7 | 20.8     | 99.9 |
| Amapá               | 61.2 | 21.3     | 99.9 | 61.2 | 21.3     | 99.9 |
| Amazonas            | 59.9 | 21.0     | 99.9 | 60.3 | 21.1     | 99.9 |
| Pará                | 56.1 | 20.5     | 99.9 | 56.5 | 20.5     | 99.9 |
| Rondônia            | 61.2 | 21.2     | 99.9 | 61.2 | 21.2     | 99.9 |
| Roraima             | 59.6 | 20.9     | 99.9 | 59.6 | 20.9     | 99.9 |
| Tocantins           | 56.7 | 20.6     | 99.9 | 57.0 | 20.7     | 99.9 |
| <b>Northeastern</b> | 57.0 | 20.6     | 99.7 | 57.3 | 20.7     | 99.9 |
| Alagoas             | 56.9 | 20.6     | 99.9 | 57.0 | 20.6     | 99.9 |
| Bahia               | 61.0 | 21.2     | 99.9 | 61.0 | 21.2     | 99.9 |
| Ceará               | 58.6 | 20.8     | 99.9 | 58.7 | 20.9     | 99.9 |
| Maranhão            | 48.7 | 19.1     | 97.9 | 49.9 | 19.5     | 99.9 |
| Paraíba             | 57.2 | 20.7     | 99.9 | 57.4 | 20.7     | 99.9 |
| Pernambuco          | 57.4 | 20.7     | 99.9 | 57.7 | 20.8     | 99.9 |
| Piauí               | 58.3 | 20.8     | 99.9 | 58.4 | 20.8     | 99.9 |
| Rio Grande do Norte | 58.6 | 20.8     | 99.9 | 58.8 | 20.9     | 99.9 |
| Sergipe             | 56.6 | 20.6     | 99.9 | 56.9 | 20.6     | 99.9 |
| <b>Mid-Western</b>  | 59.9 | 21.1     | 99.9 | 60.0 | 21.1     | 99.9 |
| Distrito Federal    | 59.0 | 20.9     | 99.9 | 58.9 | 20.9     | 99.9 |
| Goiás               | 61.3 | 21.2     | 99.9 | 61.4 | 21.4     | 99.9 |
| Mato Grosso         | 60.5 | 21.2     | 99.9 | 60.5 | 21.2     | 99.9 |
| Mato Grosso do Sul  | 58.9 | 20.9     | 99.9 | 59.1 | 21.0     | 99.9 |
| <b>Southeast</b>    | 59.6 | 21.1     | 99.9 | 59.7 | 21.1     | 99.9 |
| Espírito Santo      | 58.2 | 20.9     | 99.9 | 58.3 | 20.8     | 99.9 |
| Minas Gerais        | 58.5 | 20.9     | 99.9 | 58.5 | 20.9     | 99.9 |
| Rio de Janeiro      | 61.5 | 21.4     | 99.9 | 61.4 | 21.3     | 99.9 |
| São Paulo           | 60.0 | 21.2     | 99.9 | 60.5 | 21.2     | 99.9 |
| <b>Southern</b>     | 59.2 | 21.0     | 99.9 | 59.1 | 20.9     | 99.9 |
| Paraná              | 59.6 | 21.1     | 99.9 | 59.2 | 21.0     | 99.9 |
| Rio Grande do Sul   | 58.7 | 20.9     | 99.9 | 58.8 | 20.9     | 99.9 |
| Santa Catarina      | 59.4 | 21.0     | 99.9 | 59.4 | 20.9     | 99.9 |

\*Age-standardized rate; U.I.: uncertainty interval; SEV: summary exposure value.
